# Supplementary material
Source: Springer Nature journal article supplement (https://www.springermedizin.de/resource/supplementary/12888_2012_998_MOESM2_ESM.pdf/9479614)
Supplement: MOESM2 [file 9479614]

## Money

Now, think about your money situation at the moment.

*Do you have any worries about money?*

Tick any of the problems below that best describe your current situation or add your own items:

- Not enough money for rent/bills
- Spending more on drugs compared to when I first started
- Borrowing money from family/friends
- Having trouble budgeting for all expenses, including partying
- Not working as much
- Building up debt on credit card

+ Add another item

SAVE MY RESPONSES

Click on a character to follow their story

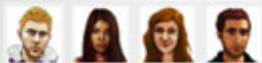

FACT SHEET

Get more information:

- [The financial impact of using drugs](#)

QUICK TIP

BACK

NEXT
